# Supplementary material for: Heavy Metal Tolerance of Microorganisms Isolated from Coastal Marine Sediments and Their Lead Removal Potential
Source: MDPI journal article supplement (doi:10.3390/microorganisms11112708), 2023-11-04
Supplement: s1 [file s1]

**Supplementary material: Heavy Metal Tolerance of Microorganisms isolated from Coastal Marine Sediments**  
and Their Lead Removal Potential

Katleen L. Alvarado-Campo <sup>1,†</sup>, Marynes Quintero <sup>1,†</sup>, Bernarda Cuadrado-Cano <sup>2</sup>,

Manuela Montoya-Giraldo <sup>1,‡</sup>, Elver Luis Otero-Tejada<sup>1</sup>, Lina Blandón<sup>1</sup>, Olga Sánchez<sup>3</sup>, Ana Zuleta-Correa<sup>1,\*</sup>,

and Javier Gómez-León <sup>1</sup>

<sup>1</sup> Marine Bioprospecting Line, Evaluation and Use of Marine and Coastal Resources Program–VAR, Marine and Coastal Research Institute–INVEMAR, Santa Marta 470006, Magdalena, Colombia;

katleen.alvarado@invemar.org.co (K.L.A.-C.); marynes.quintero@invemar.org.co (M.Q.);

elverotero@sophicol.org (E.L.O.-T.); lmblando@unal.edu.co (L.B.);

javier.gomez@invemar.org.co (J.G.-L.)

<sup>2</sup> Master's Program in Microbiology, College of Medicine, Universidad de Cartagena, Cartagena de Indias 130014, Bolívar, Colombia; bcuadradoc@unicartagena.edu.co

<sup>3</sup> Department of Genetics and Microbiology, Faculty of Biosciences, Universitat Autònoma de Barcelona, Bellaterra 08193, Spain; olga.sanchez@uab.cat

\* Correspondence: ana.zuleta@invemar.org.co

† These authors contributed equally to this work.

‡ Current address: Department of Biological Sciences, University at Albany, State University of New York, Albany 12222, NY, USA.

**Supplementary material Table S1.** Culture media for microbial isolation

| Culture media                                | Components (g.L <sup>-1</sup> ) |       | pH        | Processing method                                                                                                              |
|----------------------------------------------|---------------------------------|-------|-----------|--------------------------------------------------------------------------------------------------------------------------------|
| Starch casein agar<br>(SCA)                  | Soluble starch                  | 10    | 7.2 ± 0.2 | Direct seeding of no-pre-treatment<br>sediments, phenol pre-treatment<br>and selective pressure method<br>(HgCl <sub>2</sub> ) |
|                                              | Casein                          | 0.3   |           |                                                                                                                                |
|                                              | Sodium nitrate                  | 2.0   |           |                                                                                                                                |
|                                              | Sodium chloride                 | 2.0   |           |                                                                                                                                |
|                                              | Magnesium sulphate              | 0.05  |           |                                                                                                                                |
|                                              | Calcium carbonate               | 0.02  |           |                                                                                                                                |
|                                              | Iron sulphate                   | 0.01  |           |                                                                                                                                |
|                                              | Seawater: distilled water       | 60:40 |           |                                                                                                                                |
|                                              | Agar                            | 18    |           |                                                                                                                                |
| Either Boyd and<br>Kohlmeyer (B&K)<br>medium | Yeast extract                   | 1.0   | 7.0 ± 0.2 | Direct seeding of no-pre-treatment<br>sediments and selective pressure<br>method (HgCl <sub>2</sub> )                          |
|                                              | Peptone                         | 2.0   |           |                                                                                                                                |
|                                              | Glucose                         | 10    |           |                                                                                                                                |
|                                              | Seawater: distilled water       | 1:1   |           |                                                                                                                                |
|                                              | Streptomycin antibiotic         | 0.1   |           |                                                                                                                                |
|                                              | Agar                            | 18    |           |                                                                                                                                |
| Malt Extract agar                            | Malt extract                    | 30.0  | 5.4 ± 0.2 | Direct seeding of no-pre-treatment                                                                                             |

| Culture media                                             | Components (g.L <sup>-1</sup> )      | pH    | Processing method                                                                                                     |                                                |
|-----------------------------------------------------------|--------------------------------------|-------|-----------------------------------------------------------------------------------------------------------------------|------------------------------------------------|
|                                                           | Peptone                              | 5.0   | sediments and selective pressure method (HgCl <sub>2</sub> )                                                          |                                                |
|                                                           | Streptomycin antibiotic              | 0.1   |                                                                                                                       |                                                |
|                                                           | Agar                                 | 15    |                                                                                                                       |                                                |
| International <i>Streptomyces</i> project 2 (ISP2) medium | Yeast extract                        | 4.0   | Direct seeding of no-pre-treatment sediments and selective pressure                                                   |                                                |
|                                                           | Malt extract                         | 10    |                                                                                                                       |                                                |
|                                                           | Glucose                              | 4.0   |                                                                                                                       |                                                |
|                                                           | Sodium chloride                      | 10    |                                                                                                                       |                                                |
|                                                           | Agar                                 | 18    |                                                                                                                       |                                                |
| International <i>Streptomyces</i> project 4 (ISP4) medium | Soluble starch                       | 10    | Phenol pre-treatment and selective pressure method (HgCl <sub>2</sub> )                                               |                                                |
|                                                           | Dibasic potassium phosphate          | 1.0   |                                                                                                                       |                                                |
|                                                           | Magnesium sulphate heptahydrate      | 1.0   |                                                                                                                       |                                                |
|                                                           | Sodium chloride                      | 10    |                                                                                                                       |                                                |
|                                                           | Ammonium sulphate                    | 2.0   |                                                                                                                       |                                                |
|                                                           | Calcium carbonate                    | 2.0   |                                                                                                                       |                                                |
|                                                           | Iron sulphate heptahydrate           | 0.001 |                                                                                                                       |                                                |
|                                                           | Manganese (II) chloride tetrahydrate | 0.001 |                                                                                                                       |                                                |
|                                                           | Zinc sulphate heptahydrate           | 0.001 |                                                                                                                       |                                                |
| Agar                                                      | 18                                   |       |                                                                                                                       |                                                |
| International <i>Streptomyces</i> project 3 (ISP3) medium | White Oats                           | 20    | 7.3 ± 0.2                                                                                                             | Selective pressure method (HgCl <sub>2</sub> ) |
|                                                           | Iron sulphate heptahydrate           | 0.001 |                                                                                                                       |                                                |
|                                                           | Manganese (II) chloride tetrahydrate | 0.001 |                                                                                                                       |                                                |
|                                                           | Zinc sulphate heptahydrate           | 0.001 |                                                                                                                       |                                                |
|                                                           | Agar                                 | 18    |                                                                                                                       |                                                |
| Marine agar Difco™ (MA)                                   | Commercial preparation               |       | Direct seeding of no-pre-treatment sediments, phenol pre-treatment and selective pressure method (HgCl <sub>2</sub> ) |                                                |
| Rose Bengal Chloramphenicol agar (RBC) Merck®             | Commercial preparation               |       | Direct seeding of no-pre-treatment sediments and selective pressure method (HgCl <sub>2</sub> )                       |                                                |
| Tryptic soy agar (TSA) Scharlau Scharlab, S.L             | Commercial preparation               |       | Direct seeding of no-pre-treatment sediments                                                                          |                                                |



| Sampling site | Consecutive number MHNMC | Type of microorganisms | Tolerance screening on Luria Bertani agar (LB) |     |     |     |                                 |     |     |     |                                 |     |     |     |
|---------------|--------------------------|------------------------|------------------------------------------------|-----|-----|-----|---------------------------------|-----|-----|-----|---------------------------------|-----|-----|-----|
|               |                          |                        | Cadmium (Cd)<br>mg.L <sup>-1</sup>             |     |     |     | Lead (Pb)<br>mg.L <sup>-1</sup> |     |     |     | Zinc (Zn)<br>mg.L <sup>-1</sup> |     |     |     |
|               |                          |                        | 50                                             | 150 | 250 | 350 | 50                              | 150 | 250 | 350 | 50                              | 150 | 250 | 350 |
| MARM          | 76870                    | Bacteria               | +                                              | +   | +   | ±   | +                               | +   | +   | +   | +                               | +   | +   | ±   |
| MARM          | 76871                    | Bacteria               | ±                                              | -   | -   | -   | +                               | +   | +   | +   | +                               | +   | ±   | -   |
| MARM          | 76872                    | Bacteria               | +                                              | +   | +   | +   | +                               | +   | +   | +   | +                               | +   | +   | +   |
| MARM          | 76873                    | Bacteria               | +                                              | +   | +   | +   | +                               | +   | +   | +   | +                               | +   | +   | +   |
| MARM          | 76874                    | Bacteria               | +                                              | +   | +   | +   | +                               | +   | +   | +   | +                               | +   | +   | +   |
| MARM          | 76875                    | Bacteria               | +                                              | +   | -   | -   | +                               | +   | +   | +   | +                               | +   | +   | +   |
| MARM          | 76876                    | Bacteria               | ±                                              | -   | -   | -   | +                               | ±   | -   | -   | +                               | +   | ±   | ±   |
| MARM          | 76877                    | Bacteria               | +                                              | +   | +   | +   | +                               | +   | -   | -   | -                               | -   | -   | -   |
| MARM          | 76878                    | Bacteria               | +                                              | +   | +   | ±   | +                               | +   | +   | +   | +                               | +   | +   | +   |
| MARM          | 76879                    | Bacteria               | +                                              | +   | +   | +   | +                               | +   | +   | +   | +                               | +   | +   | +   |
| MARM          | 76880                    | Bacteria               | +                                              | +   | +   | +   | +                               | +   | +   | +   | +                               | +   | +   | +   |
| MARM          | 76881                    | Bacteria               | +                                              | +   | +   | +   | +                               | +   | +   | +   | +                               | +   | +   | +   |
| MARM          | 76882                    | Bacteria               | +                                              | +   | +   | +   | +                               | +   | +   | +   | +                               | +   | +   | +   |
| MARM          | 76883                    | Bacteria               | +                                              | +   | +   | +   | +                               | +   | +   | +   | +                               | +   | +   | +   |
| MARM          | 76884                    | Bacteria               | +                                              | +   | -   | -   | +                               | +   | +   | +   | +                               | +   | +   | +   |
| MARM          | 76885                    | Bacteria               | -                                              | -   | -   | -   | +                               | +   | +   | +   | +                               | -   | -   | -   |
| MARM          | 76886                    | Bacteria               | +                                              | +   | +   | +   | +                               | +   | +   | +   | +                               | +   | +   | +   |
| MARM          | 76887                    | Bacteria               | -                                              | -   | -   | -   | +                               | +   | +   | +   | ±                               | ±   | ±   | ±   |
| MARM          | 76888                    | Bacteria               | -                                              | -   | -   | -   | +                               | +   | +   | +   | ±                               | -   | -   | -   |
| MARM          | 77109                    | yeast                  | +                                              | +   | +   | +   | +                               | +   | +   | +   | +                               | +   | +   | +   |
| MARM          | 77111                    | yeast                  | +                                              | +   | ±   | ±   | +                               | +   | +   | +   | +                               | +   | +   | +   |
| MRAR          | 77115                    | yeast                  | +                                              | -   | -   | -   | +                               | +   | +   | +   | +                               | +   | +   | +   |
| MRAR          | 77116                    | yeast                  | +                                              | -   | -   | -   | +                               | +   | +   | +   | +                               | +   | +   | +   |
| MRAR          | 77118                    | yeast                  | +                                              | -   | -   | -   | +                               | +   | +   | +   | +                               | +   | +   | +   |
| MPAR          | 77124                    | yeast                  | -                                              | -   | -   | -   | +                               | +   | +   | +   | +                               | +   | +   | +   |
| MRAR          | 77127                    | yeast                  | -                                              | -   | -   | -   | +                               | +   | +   | +   | +                               | +   | +   | -   |
| MRAR          | 77129                    | yeast                  | +                                              | -   | -   | -   | +                               | +   | +   | +   | +                               | +   | +   | +   |
| MRAR          | 76891                    | Bacteria               | +                                              | +   | +   | +   | +                               | +   | +   | +   | +                               | +   | +   | +   |
| MRAR          | 76892                    | Bacteria               | ±                                              | ±   | -   | -   | +                               | +   | ±   | ±   | +                               | +   | -   | -   |
| MRAR          | 76893                    | Bacteria               | +                                              | +   | +   | +   | +                               | +   | +   | +   | +                               | +   | +   | +   |
| MRAR          | 76894                    | Bacteria               | +                                              | +   | +   | +   | +                               | +   | +   | +   | +                               | +   | +   | +   |
| MPAR          | 76895                    | Bacteria               | +                                              | +   | +   | +   | +                               | +   | +   | +   | +                               | +   | +   | +   |
| MPAR          | 76896                    | Bacteria               | +                                              | ±   | -   | -   | +                               | +   | +   | +   | +                               | +   | +   | +   |
| MPAR          | 76897                    | Bacteria               | +                                              | ±   | ±   | -   | +                               | +   | +   | +   | +                               | +   | +   | +   |
| MPAR          | 76898                    | Bacteria               | -                                              | -   | -   | -   | +                               | +   | +   | +   | +                               | +   | +   | +   |
| MPAR          | 76899                    | Bacteria               | +                                              | +   | +   | +   | +                               | +   | +   | +   | +                               | +   | +   | +   |
| MPAR          | 76900                    | Bacteria               | -                                              | -   | -   | -   | +                               | +   | +   | +   | +                               | +   | +   | +   |

| Sampling site | Consecutive number MHNMC | Type of microorganisms | Tolerance screening on Luria Bertani agar (LB) |     |     |     |                              |     |     |     |                              |     |     |     |
|---------------|--------------------------|------------------------|------------------------------------------------|-----|-----|-----|------------------------------|-----|-----|-----|------------------------------|-----|-----|-----|
|               |                          |                        | Cadmium (Cd) mg.L <sup>-1</sup>                |     |     |     | Lead (Pb) mg.L <sup>-1</sup> |     |     |     | Zinc (Zn) mg.L <sup>-1</sup> |     |     |     |
|               |                          |                        | 50                                             | 150 | 250 | 350 | 50                           | 150 | 250 | 350 | 50                           | 150 | 250 | 350 |
| MPAR          | 76901                    | Bacteria               | -                                              | -   | -   | -   | -                            | -   | -   | -   | ±                            | -   | -   | -   |
| MPAR          | 76902                    | Bacteria               | +                                              | +   | +   | -   | +                            | +   | +   | +   | +                            | +   | +   | +   |
| MPAR          | 76903                    | Bacteria               | +                                              | +   | +   | +   | +                            | +   | +   | +   | +                            | +   | +   | +   |
| MARM          | 76905                    | Bacteria               | +                                              | +   | +   | +   | +                            | +   | +   | +   | +                            | +   | +   | +   |
| MARM          | 76906                    | Bacteria               | +                                              | +   | +   | +   | +                            | +   | +   | +   | +                            | +   | +   | +   |
| MARM          | 76907                    | Bacteria               | -                                              | -   | -   | -   | +                            | +   | +   | +   | +                            | +   | +   | -   |
| MRAR          | 76908                    | Bacteria               | -                                              | -   | -   | -   | +                            | +   | +   | +   | +                            | ±   | -   | -   |
| MARM          | 76909                    | Bacteria               | +                                              | +   | +   | +   | +                            | +   | +   | +   | +                            | +   | +   | +   |
| MARM          | 76910                    | Bacteria               | +                                              | +   | +   | +   | +                            | +   | +   | +   | +                            | +   | +   | +   |
| MARM          | 76911                    | Bacteria               | +                                              | +   | +   | +   | +                            | +   | +   | +   | +                            | +   | +   | +   |
| MARM          | 76912                    | Bacteria               | ±                                              | -   | -   | -   | +                            | +   | +   | +   | +                            | +   | ±   | ±   |
| MARM          | 76913                    | Bacteria               | ±                                              | ±   | ±   | ±   | +                            | +   | +   | +   | +                            | ±   | ±   | ±   |
| MARM          | 76914                    | Bacteria               | -                                              | -   | -   | -   | +                            | +   | +   | +   | +                            | +   | ±   | ±   |
| MRAR          | 76916                    | Bacteria               | +                                              | +   | +   | +   | +                            | +   | +   | +   | +                            | +   | +   | +   |
| OBR           | 76917                    | Bacteria               | -                                              | -   | -   | -   | +                            | ±   | ±   | ±   | +                            | +   | -   | -   |
| OBR           | 76918                    | Bacteria               | +                                              | +   | +   | +   | +                            | +   | +   | +   | +                            | +   | +   | +   |
| OBR           | 76919                    | Bacteria               | -                                              | -   | -   | -   | +                            | +   | +   | +   | +                            | +   | ±   | ±   |
| OBR           | 76920                    | Bacteria               | -                                              | -   | -   | -   | +                            | +   | +   | +   | +                            | +   | +   | +   |
| OBR           | 76921                    | Bacteria               | +                                              | +   | +   | +   | +                            | +   | +   | +   | +                            | +   | +   | +   |
| OBR           | 76922                    | Bacteria               | ±                                              | ±   | ±   | ±   | +                            | +   | +   | +   | +                            | ±   | ±   | ±   |
| OBR           | 76923                    | Bacteria               | -                                              | -   | -   | -   | +                            | +   | +   | +   | +                            | +   | -   | -   |
| OBR           | 76924                    | Bacteria               | +                                              | -   | -   | -   | +                            | +   | +   | +   | +                            | +   | +   | +   |
| OBR           | 76925                    | Bacteria               | +                                              | +   | +   | +   | +                            | +   | +   | +   | +                            | +   | +   | +   |
| OBR           | 76926                    | Bacteria               | +                                              | ±   | -   | -   | +                            | +   | +   | +   | +                            | +   | +   | +   |
| OBR           | 76927                    | Bacteria               | -                                              | -   | -   | -   | +                            | +   | +   | +   | +                            | -   | -   | -   |
| OBR           | 76928                    | Bacteria               | ±                                              | -   | -   | -   | +                            | +   | +   | +   | +                            | +   | +   | ±   |
| OBR           | 76929                    | Bacteria               | +                                              | +   | +   | +   | +                            | +   | +   | +   | +                            | +   | +   | +   |
| OBR           | 76930                    | Bacteria               | +                                              | ±   | ±   | -   | +                            | +   | +   | +   | +                            | +   | +   | +   |
| MVUBR         | 76931                    | Bacteria               | +                                              | +   | +   | +   | +                            | +   | +   | +   | +                            | +   | +   | +   |
| MVUBR         | 76932                    | Bacteria               | -                                              | -   | -   | -   | +                            | +   | +   | +   | +                            | +   | +   | +   |
| MVUBR         | 76933                    | Bacteria               | -                                              | -   | -   | -   | +                            | +   | +   | +   | -                            | -   | -   | -   |
| MVUBR         | 76934                    | Bacteria               | +                                              | ±   | ±   | ±   | +                            | +   | +   | +   | +                            | +   | +   | +   |
| MVUBR         | 76935                    | Bacteria               | +                                              | ±   | -   | -   | +                            | +   | +   | +   | +                            | +   | +   | -   |
| MVUBR         | 76936                    | Bacteria               | -                                              | -   | -   | -   | +                            | +   | +   | +   | +                            | +   | +   | +   |
| MVUBR         | 76937                    | Bacteria               | +                                              | +   | +   | +   | +                            | +   | +   | +   | +                            | +   | +   | +   |
| MVUBR         | 76938                    | Bacteria               | +                                              | -   | -   | -   | +                            | +   | +   | +   | +                            | +   | +   | +   |
| MVUBR         | 76939                    | Bacteria               | -                                              | -   | -   | -   | +                            | +   | +   | +   | +                            | +   | +   | +   |

[illegible]

| Sampling site | Consecutive number MHNMC | Type of microorganisms | Tolerance screening on Luria Bertani agar (LB) |     |     |     |                                 |     |     |     |                                 |     |     |     |
|---------------|--------------------------|------------------------|------------------------------------------------|-----|-----|-----|---------------------------------|-----|-----|-----|---------------------------------|-----|-----|-----|
|               |                          |                        | Cadmium (Cd)<br>mg.L <sup>-1</sup>             |     |     |     | Lead (Pb)<br>mg.L <sup>-1</sup> |     |     |     | Zinc (Zn)<br>mg.L <sup>-1</sup> |     |     |     |
|               |                          |                        | 50                                             | 150 | 250 | 350 | 50                              | 150 | 250 | 350 | 50                              | 150 | 250 | 350 |
| MCHSJ2        | 76975                    | Bacteria               | -                                              | -   | -   | -   | -                               | -   | -   | -   | -                               | -   | -   | -   |
| MCHSJ2        | 76976                    | Bacteria               | ±                                              | ±   | ±   | ±   | +                               | +   | +   | +   | +                               | +   | +   | ±   |
| MCHSJ2        | 76977                    | Bacteria               | +                                              | +   | +   | -   | +                               | +   | +   | +   | +                               | +   | +   | +   |
| MCHSJ2        | 76978                    | Bacteria               | +                                              | +   | +   | -   | +                               | +   | +   | +   | +                               | +   | +   | +   |
| MCHSJ2        | 76979                    | Bacteria               | ±                                              | ±   | ±   | ±   | ±                               | ±   | ±   | ±   | +                               | +   | +   | +   |
| MCHSJ2        | 76980                    | Bacteria               | +                                              | +   | +   | +   | +                               | +   | +   | +   | +                               | -   | -   | -   |
| MSJ2          | 76981                    | yeast                  | ±                                              | ±   | -   | -   | +                               | +   | +   | +   | +                               | +   | +   | +   |
| MSJ2          | 76982                    | Bacteria               | +                                              | ±   | ±   | -   | +                               | +   | +   | +   | +                               | +   | +   | +   |
| MSJ2          | 76983                    | Bacteria               | +                                              | -   | -   | -   | +                               | +   | +   | +   | +                               | +   | +   | +   |
| MSJ2          | 76984                    | Bacteria               | -                                              | -   | -   | -   | +                               | +   | +   | +   | +                               | +   | +   | +   |
| MSJ2          | 76985                    | Bacteria               | -                                              | -   | -   | -   | +                               | +   | +   | +   | +                               | +   | +   | -   |
| MSJ2          | 76986                    | Bacteria               | -                                              | -   | -   | -   | +                               | +   | +   | +   | +                               | +   | +   | +   |
| MSJ2          | 76987                    | Bacteria               | +                                              | +   | +   | +   | +                               | +   | +   | +   | +                               | +   | +   | +   |
| MSJ2          | 76988                    | Bacteria               | +                                              | +   | ±   | ±   | +                               | +   | ±   | ±   | +                               | +   | +   | +   |
| MSJ2          | 76989                    | Bacteria               | -                                              | -   | -   | -   | +                               | +   | +   | +   | +                               | +   | +   | -   |
| MSJ2          | 76991                    | Bacteria               | +                                              | +   | +   | -   | +                               | +   | +   | +   | +                               | +   | +   | +   |
| MSJ2          | 76992                    | Bacteria               | +                                              | ±   | -   | -   | +                               | +   | +   | +   | +                               | +   | +   | +   |
| MSJ2          | 76993                    | Bacteria               | -                                              | -   | -   | -   | +                               | +   | +   | +   | +                               | +   | +   | +   |
| MSJ2          | 76994                    | Bacteria               | ±                                              | -   | -   | -   | +                               | +   | +   | +   | +                               | +   | +   | -   |
| MSJ2          | 76995                    | Bacteria               | -                                              | -   | -   | -   | +                               | +   | +   | +   | +                               | +   | +   | +   |
| BSJM2         | 76996                    | Bacteria               | -                                              | -   | -   | -   | +                               | +   | +   | +   | -                               | -   | -   | -   |
| BSJM2         | 76997                    | Bacteria               | -                                              | -   | -   | -   | -                               | -   | -   | -   | -                               | -   | -   | -   |
| BSJM2         | 76998                    | Bacteria               | -                                              | -   | -   | -   | +                               | +   | +   | ±   | +                               | +   | ±   | ±   |
| BSJM2         | 76999                    | Bacteria               | +                                              | +   | ±   | ±   | +                               | +   | +   | +   | +                               | +   | +   | ±   |
| BSJM2         | 77000                    | Bacteria               | ±                                              | ±   | ±   | ±   | +                               | +   | -   | -   | -                               | -   | -   | -   |
| BSJM2         | INV<br>PRT211*           | Bacteria               | +                                              | +   | +   | +   | +                               | +   | +   | +   | +                               | +   | +   | +   |
| BSJM2         | 77002                    | Bacteria               | +                                              | +   | +   | +   | +                               | +   | +   | +   | +                               | +   | +   | +   |
| BSJM2         | 77003                    | Bacteria               | +                                              | +   | -   | -   | +                               | +   | +   | +   | +                               | +   | +   | +   |
| BSJM2         | 77004                    | Bacteria               | +                                              | +   | -   | -   | +                               | +   | +   | +   | +                               | +   | +   | +   |
| BSJM2         | 77005                    | Bacteria               | -                                              | -   | -   | -   | +                               | +   | +   | +   | +                               | +   | +   | ±   |
| MCHSJ2        | 77144                    | yeast                  | -                                              | -   | -   | -   | +                               | +   | +   | +   | +                               | +   | +   | +   |
| MCHSJ2        | 77145                    | yeast                  | -                                              | -   | -   | -   | +                               | +   | +   | +   | +                               | +   | +   | +   |
| MCHSJ2        | 77146                    | yeast                  | ±                                              | -   | -   | -   | +                               | +   | +   | +   | +                               | +   | ±   | -   |
| MCHSJ2        | 77149                    | yeast                  | -                                              | -   | -   | -   | -                               | -   | -   | -   | +                               | +   | +   | +   |
| MCHSJ2        | 77152                    | Bacteria               | ±                                              | -   | -   | -   | +                               | +   | +   | +   | ±                               | ±   | ±   | ±   |
| BSJM2         | 77153                    | Bacteria               | +                                              | +   | +   | +   | +                               | +   | +   | +   | +                               | +   | +   | +   |
| BSJM2         | 77154                    | yeast                  | +                                              | ±   | ±   | ±   | +                               | +   | +   | +   | +                               | +   | +   | +   |

[illegible]



[illegible]

| Sampling site | Consecutive number MHNMC | Type of microorganisms | Tolerance screening on Luria Bertani agar (LB) |     |     |     |                              |     |     |     |                              |     |     |     |
|---------------|--------------------------|------------------------|------------------------------------------------|-----|-----|-----|------------------------------|-----|-----|-----|------------------------------|-----|-----|-----|
|               |                          |                        | Cadmium (Cd) mg.L <sup>-1</sup>                |     |     |     | Lead (Pb) mg.L <sup>-1</sup> |     |     |     | Zinc (Zn) mg.L <sup>-1</sup> |     |     |     |
|               |                          |                        | 50                                             | 150 | 250 | 350 | 50                           | 150 | 250 | 350 | 50                           | 150 | 250 | 350 |
| OBR           | 77077                    | Bacteria               | +                                              | +   | +   | +   | +                            | +   | +   | +   | +                            | +   | +   | +   |
| OBR           | 77078                    | Bacteria               | +                                              | +   | +   | +   | +                            | +   | +   | +   | +                            | +   | +   | +   |
| OBR           | 77079                    | Bacteria               | +                                              | +   | -   | -   | +                            | +   | +   | +   | +                            | +   | +   | +   |
| MCHSJ2        | 77080                    | Bacteria               | ±                                              | ±   | ±   | ±   | +                            | +   | +   | +   | +                            | +   | +   | +   |
| MCHSJ2        | 77081                    | Bacteria               | ±                                              | ±   | ±   | ±   | +                            | +   | +   | +   | +                            | +   | +   | +   |
| MCHSJ2        | 77082                    | Bacteria               | +                                              | +   | +   | +   | +                            | +   | +   | +   | +                            | +   | +   | +   |
| MRAR          | 77083                    | Bacteria               | +                                              | +   | +   | +   | +                            | +   | +   | +   | +                            | +   | +   | +   |
| MARM          | 77084                    | Bacteria               | +                                              | -   | -   | -   | +                            | +   | +   | +   | +                            | +   | +   | +   |
| MARM          | 77085                    | Bacteria               | -                                              | -   | -   | -   | -                            | -   | -   | -   | -                            | -   | -   | -   |
| MARM          | 77086                    | Bacteria               | +                                              | +   | +   | -   | +                            | +   | +   | +   | +                            | +   | +   | -   |
| MVUBR         | 77087                    | Bacteria               | ±                                              | ±   | ±   | ±   | +                            | +   | +   | +   | +                            | +   | +   | +   |
| MVUBR         | 77088                    | Bacteria               | +                                              | +   | +   | -   | +                            | +   | +   | +   | +                            | +   | +   | +   |
| MARM          | 77089                    | Bacteria               | +                                              | +   | +   | +   | +                            | +   | +   | +   | +                            | +   | +   | +   |
| MARM          | 77090                    | Bacteria               | +                                              | +   | +   | +   | +                            | +   | +   | +   | +                            | +   | +   | +   |
| MARM          | 77091                    | Bacteria               | +                                              | +   | +   | +   | +                            | +   | +   | +   | +                            | +   | +   | +   |
| MARM          | 77092                    | Bacteria               | +                                              | +   | +   | -   | +                            | +   | +   | +   | +                            | +   | +   | +   |
| MARM          | 77093                    | Bacteria               | +                                              | +   | +   | +   | -                            | -   | -   | -   | +                            | +   | +   | +   |
| BSJM2         | 77094                    | Bacteria               | +                                              | +   | +   | +   | +                            | +   | +   | +   | +                            | +   | +   | +   |
| MVUBR         | 77096                    | Bacteria               | +                                              | +   | -   | -   | +                            | +   | +   | +   | +                            | +   | +   | +   |
| MVUBR         | 77097                    | Bacteria               | +                                              | +   | +   | +   | +                            | +   | +   | +   | +                            | +   | +   | +   |
| MVUBR         | 77098                    | Bacteria               | +                                              | +   | -   | -   | +                            | +   | +   | +   | +                            | +   | +   | +   |
| MCHSJ2        | 77099                    | Bacteria               | +                                              | +   | +   | +   | +                            | +   | +   | +   | +                            | +   | +   | +   |
| MCHSJ2        | 77100                    | Bacteria               | +                                              | +   | +   | +   | +                            | +   | +   | +   | +                            | +   | +   | +   |
| MCHSJ2        | 77101                    | Bacteria               | +                                              | +   | +   | +   | +                            | +   | +   | +   | +                            | +   | +   | +   |
| BSJM2         | 77103                    | Bacteria               | +                                              | +   | +   | +   | +                            | +   | +   | +   | +                            | +   | +   | +   |
| BSJM2         | 77104                    | Bacteria               | +                                              | +   | +   | +   | +                            | +   | +   | +   | +                            | +   | +   | +   |
| MPAR          | 77105                    | Bacteria               | ±                                              | -   | -   | -   | +                            | +   | +   | +   | +                            | +   | +   | +   |
| MPAR          | 77106                    | Bacteria               | +                                              | +   | +   | +   | +                            | +   | +   | +   | +                            | +   | +   | +   |
| MPAR          | 77107                    | Bacteria               | +                                              | +   | +   | +   | +                            | +   | +   | +   | +                            | +   | +   | +   |

\* Catalog number of the Marine Museum of Natural History of Colombia–Makuriwa located in INVEMAR

**Supplementary material Table S3.** Cadmium (Cd<sup>2+</sup>), Lead (Pb<sup>2+</sup>), and Zinc (Zn<sup>2+</sup>) tolerance screening trials at increased concentrations of Pb<sup>2+</sup>, Cd<sup>2+</sup> and Zn<sup>2+</sup> ions of eleven microorganisms. A microorganism was catalogued as tolerant (+) if growth was observed after 24-48 h of culture; not tolerant (-) if growth was inhibited entirely around wells, or sensitive (±) if some colonies were formed (36).

| Sampling site        | Consecutive numbers MHNMC | Type of microorganisms | Tolerance screening on Luria Bertani agar (LB) |     |                              |     |     |     |                              |     |     |     |
|----------------------|---------------------------|------------------------|------------------------------------------------|-----|------------------------------|-----|-----|-----|------------------------------|-----|-----|-----|
|                      |                           |                        | Cadmium (Cd) mg.L <sup>-1</sup>                |     | Lead (Pb) mg.L <sup>-1</sup> |     |     |     | Zinc (Zn) mg.L <sup>-1</sup> |     |     |     |
|                      |                           |                        | 550                                            | 750 | 450                          | 550 | 650 | 750 | 450                          | 550 | 650 | 750 |
| Atrato river mouth   | 76869                     | Bacteria               | -                                              | -   | +                            | +   | +   | +   | +                            | +   | +   | +   |
|                      | 77030                     | Bacteria               | +                                              | +   | +                            | +   | +   | +   | +                            | +   | +   | +   |
|                      | INV PRT213*               | Bacteria               | +                                              | +   | +                            | +   | +   | +   | +                            | +   | +   | +   |
| San Juan river mouth | 76956                     | Bacteria               | -                                              | -   | +                            | +   | +   | -   | +                            | +   | -   | -   |
|                      | 77001                     | Bacteria               | +                                              | +   | +                            | +   | +   | +   | +                            | +   | +   | +   |
|                      | 77050                     | Bacteria               | +                                              | +   | +                            | +   | +   | +   | +                            | +   | +   | +   |
|                      | INV PRT215*               | Bacteria               | +                                              | +   | +                            | +   | +   | +   | +                            | +   | +   | +   |
|                      | 77103                     | Bacteria               | -                                              | -   | +                            | +   | +   | +   | +                            | +   | +   | +   |
| Baudó river mouth    | 76952                     | Bacteria               | +                                              | -   | +                            | +   | +   | -   | +                            | +   | -   | -   |
|                      | INV PRT216*               | Bacteria               | +                                              | +   | +                            | +   | +   | +   | +                            | +   | +   | +   |
|                      | 77058                     | Bacteria               | -                                              | -   | +                            | -   | -   | -   | +                            | +   | +   | +   |

\* Catalog number of the Marine Museum of Natural History of Colombia–Makuriwa located in INVEMAR

**Supplementary material Table S4.** Results obtained by comparing the 16S rRNA sequences to those in the Reference RNA Sequences database of the NCBI.

| Catalog number MMNHC* | Description Genera                          | Accession number GenBank | Query cover | Ident  | E-value |
|-----------------------|---------------------------------------------|--------------------------|-------------|--------|---------|
| INV PRT211            | <i>Stenotrophomonas panacihumi</i>          | NR_117406.1              | 99%         | 97.88% | 0.0     |
|                       | <i>Xanthomonas hortensias</i>               | NR_181958.1              | 99%         | 97.53% | 0.0     |
|                       | <i>Xanthomonas campestris</i>               | NR_074936.1              | 99%         | 97.53% | 0.0     |
|                       | <i>Xanthomonas arboricola pv. juglandis</i> | NR_113167.1              | 99%         | 97.53% | 0.0     |

| Catalog number<br>MMNHC* | Description<br>Genera                           | Accession number<br>GenBank | Query<br>cover | Ident  | E-value |
|--------------------------|-------------------------------------------------|-----------------------------|----------------|--------|---------|
| INV PRT212               | <i>Xanthomonas hortorum</i> pv. <i>gardneri</i> | NR_104793.1                 | 99%            | 97.53% | 0,0     |
|                          | <i>Enterobacter sichuanensis</i>                | NR_179946.1                 | 100%           | 99.68% | 0,0     |
|                          | <i>Enterobacter chengduensis</i>                | NR_179167.1                 | 100%           | 99.68% | 0,0     |
|                          | <i>Enterobacter quasiroggenkampii</i>           | NR_179166.1                 | 100%           | 99.68% | 0,0     |
|                          | <i>Enterobacter bugandensis</i>                 | NR_148649.1                 | 100%           | 99.68% | 0,0     |
|                          | <i>Enterobacter mori</i>                        | NR_146667.2                 | 100%           | 99.68% | 0,0     |
|                          | <i>Enterobacter soli</i>                        | NR_117547.1                 | 100%           | 99.15% | 0,0     |
|                          | <i>Huaxiibacter chinensis</i>                   | NR_184601.1                 | 100%           | 98.58% | 0,0     |
| INV PRT213               | <i>Enterobacter asburiae</i>                    | NR_024640.1                 | 99%            | 98.28% | 0.0     |
|                          | <i>Klebsiella aerogenes</i>                     | NR_113614.1                 | 100%           | 98.15% | 0.0     |
|                          | <i>Klebsiella aerogenes</i>                     | NR_102493.2                 | 100%           | 98.15% | 0.0     |
|                          | <i>Pseudomonas protegens</i>                    | NR_114749.1                 | 100%           | 99.56% | 0.0     |
| INV PRT215               | <i>Pseudomonas sesami</i>                       | NR_149822.1                 | 100%           | 99.34% | 0.0     |
|                          | <i>Pseudomonas saponiphila</i>                  | NR_116905.1                 | 99%            | 98.75% | 0.0     |
|                          | <i>Pseudomonas meliae</i>                       | NR_178423.1                 | 100%           | 98.67% | 0.0     |

| Catalog number<br>MMNHC* | Description<br>Genera               | Accession number<br>GenBank | Query<br>cover | Ident  | E-value |
|--------------------------|-------------------------------------|-----------------------------|----------------|--------|---------|
|                          | <i>Pseudomonas tremae</i>           | NR_025549.1                 | 100%           | 98.67% | 0.0     |
|                          | <i>Stenotrophomonas maltophilia</i> | NR_041577.1                 | 100%           | 99.43% | 0.0     |
|                          | <i>Stenotrophomonas maltophilia</i> | NR_113648.1                 | 100%           | 99.36% | 0.0     |
| INV PRT216               | <i>Stenotrophomonas maltophilia</i> | NR_119220.1                 | 100%           | 99.36% | 0.0     |
|                          | <i>Stenotrophomonas maltophilia</i> | NR_112030.1                 | 100%           | 99.36% | 0.0     |
|                          | <i>Stenotrophomonas pavanii</i>     | NR_116793.1                 | 100%           | 99.14% | 0.0     |

\* Catalog number of the Marine Museum of Natural History of Colombia–Makuriwa located in INVEMAR

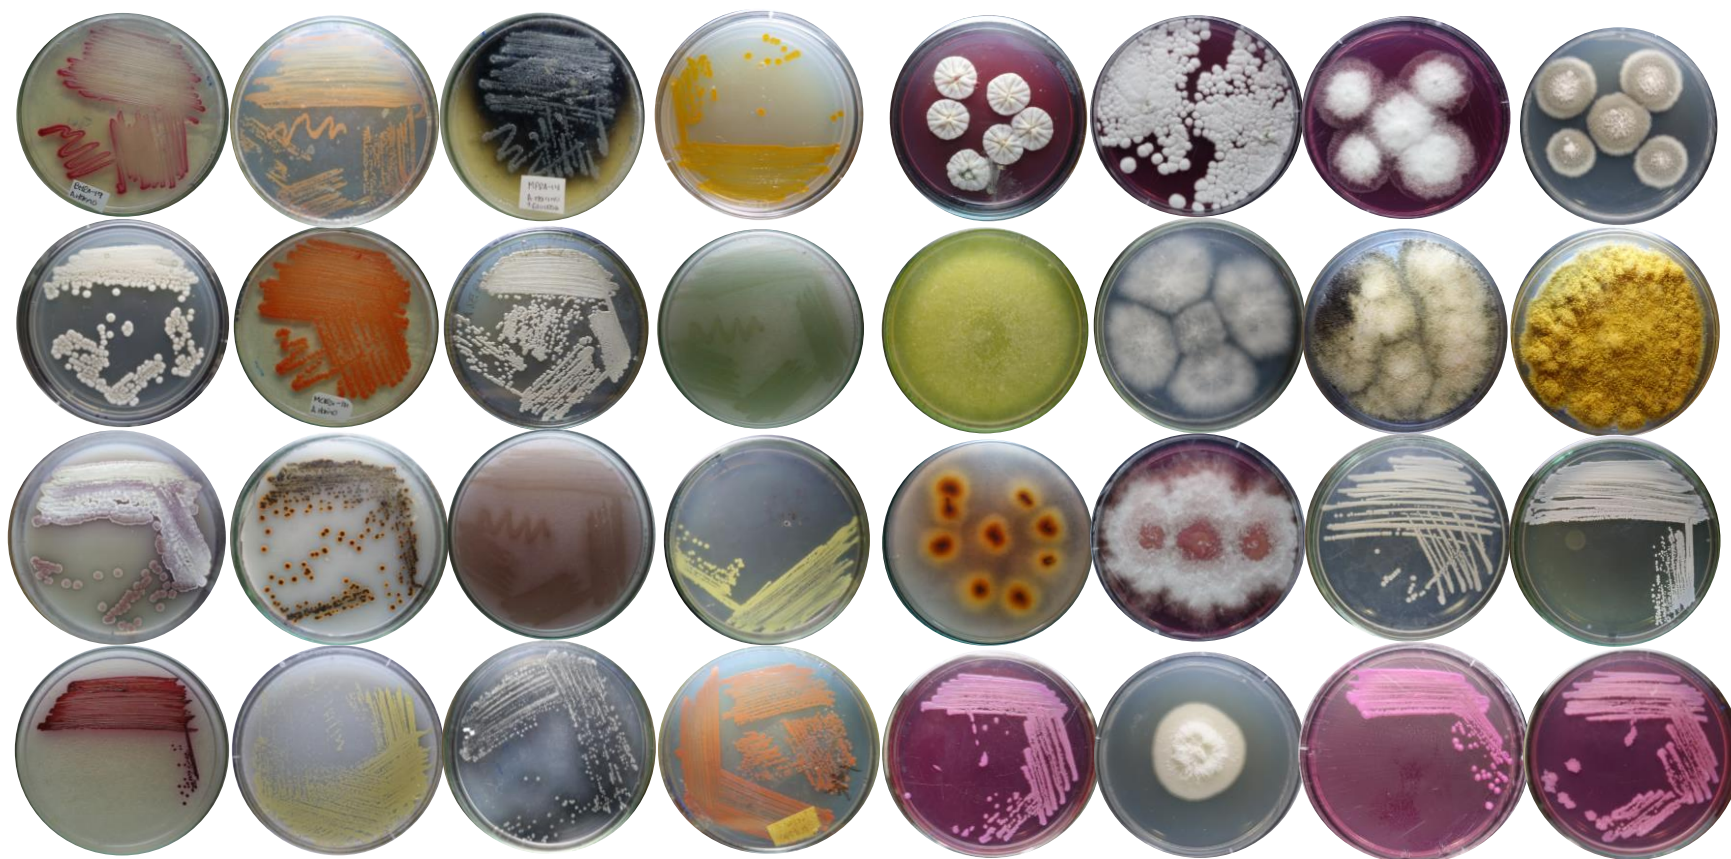

**Supplementary material Figure S1.** Phenotypic characteristics of some isolated colonies.

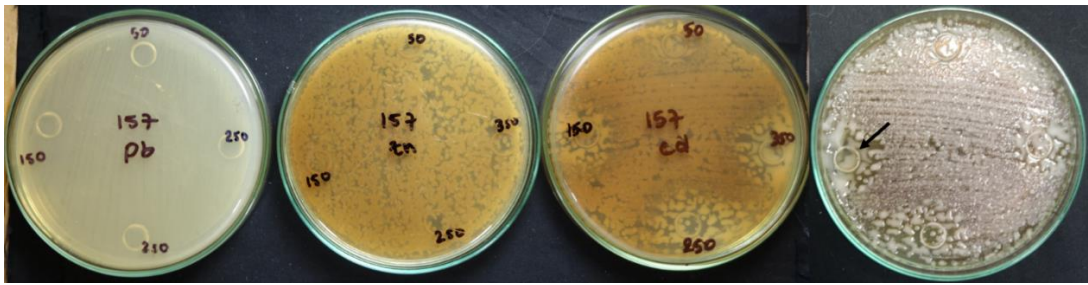

**Supplementary material Figure S2.** Photographic record of pigments and substances excreted by bacterium 76955 under  $\text{Cd}^{2+}$  and  $\text{Zn}^{2+}$  stress conditions.

## Atrato

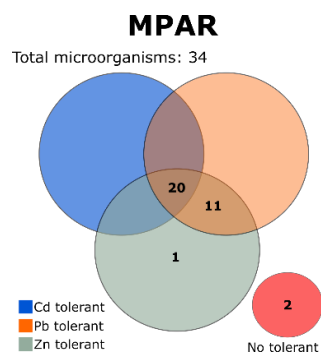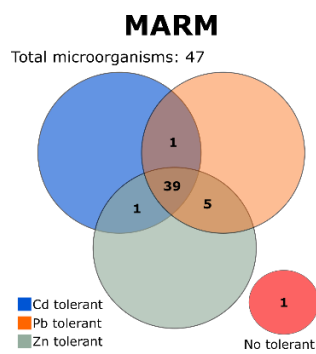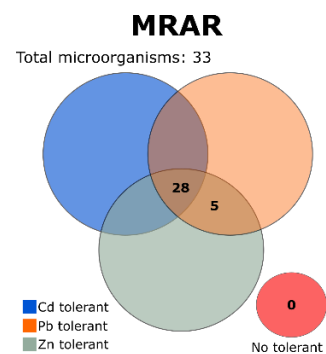

## San Juan

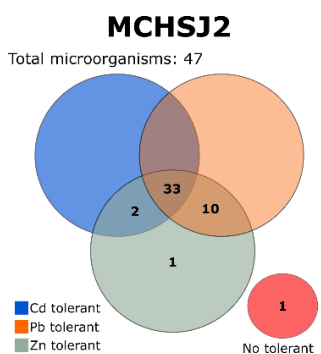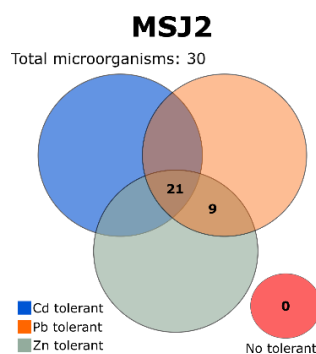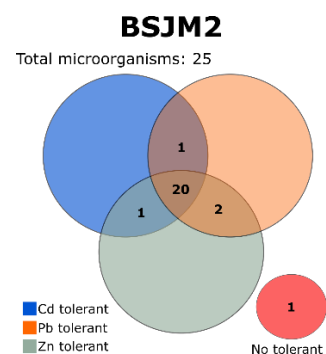

## Baudó

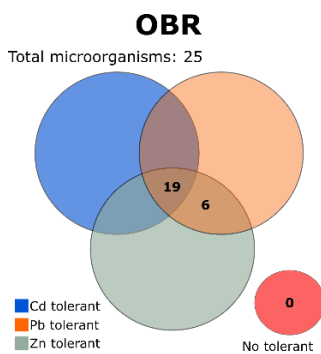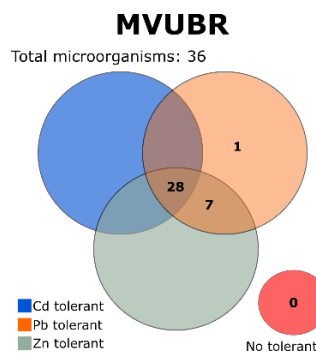

**Supplementary material Figure S3.** Number of strains tolerant to  $\text{Cd}^{2+}$ ,  $\text{Pb}^{2+}$ , and  $\text{Zn}^{2+}$  ions by sampling site. Sampling sites: Atrato river mouth (MPAR, MARM, MRAR), Baudó river mouth (OBR, MVUBR), and San Juan river mouth (MCHSJ2, MSJ2, BSJM2)
